# Supplementary material for: agReg-SNPdb: A Database of Regulatory SNPs for Agricultural Animal Species
Source: MDPI journal article supplement (doi:10.3390/biology10080790), 2021-08-17
Supplement: s1 [file s1]

**Supplementary Figures S4:** Distribution of rSNPs around the TSS for each animal stored in agReg-SNPdb.

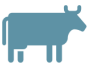

Cattle

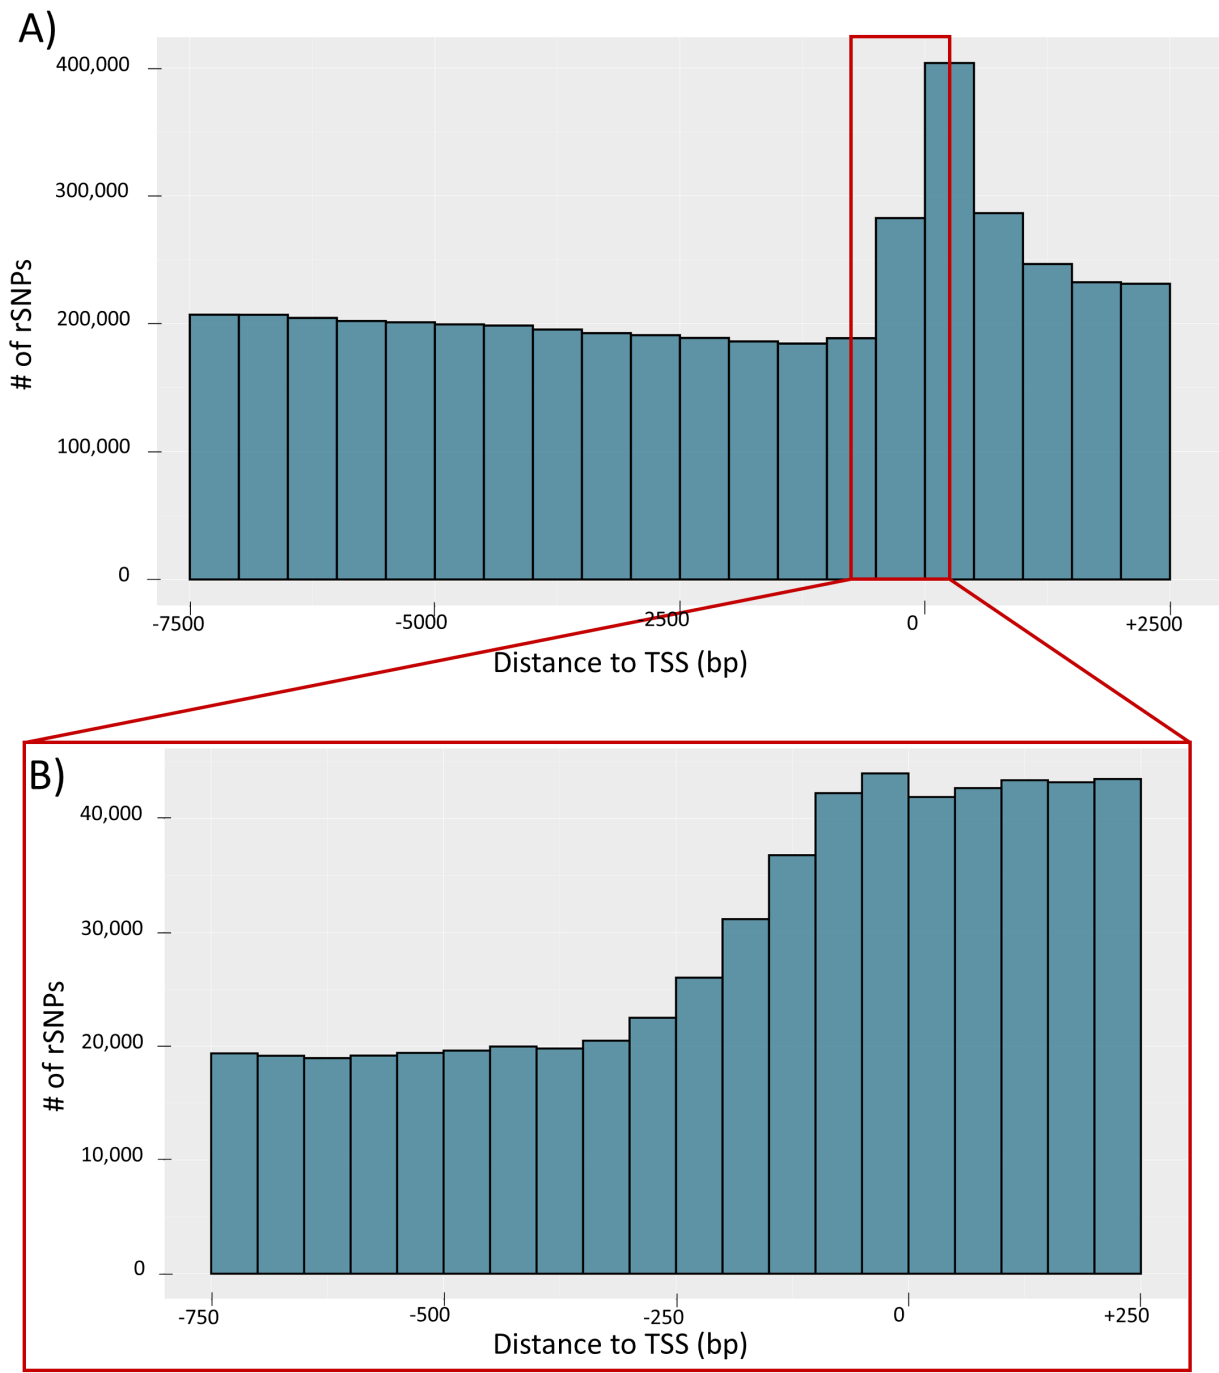

**Figure S4.1:** Distribution of rSNPs around the TSS of cattle. A) shows the counts for the whole promoter region (-7.5 kb to +2.5 kb) in 500 bp intervals. The enlargement in B) shows the proximal promoter region (-750 bp to +250 bp) in 50 bp intervals.

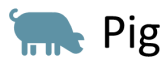

Pig

A)

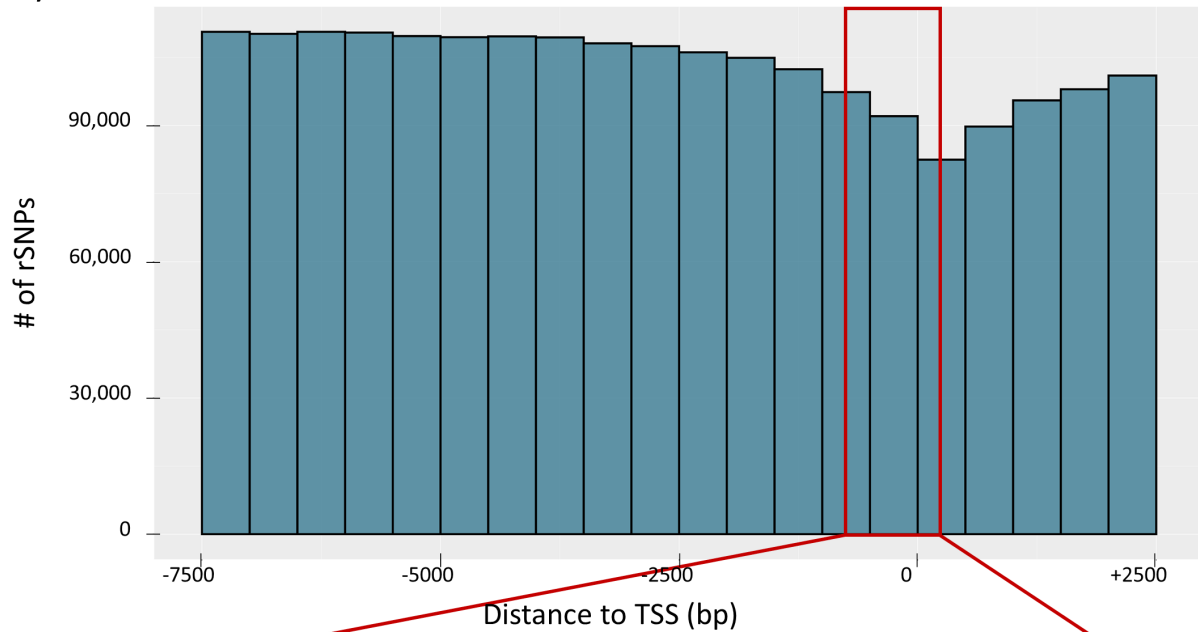

B)

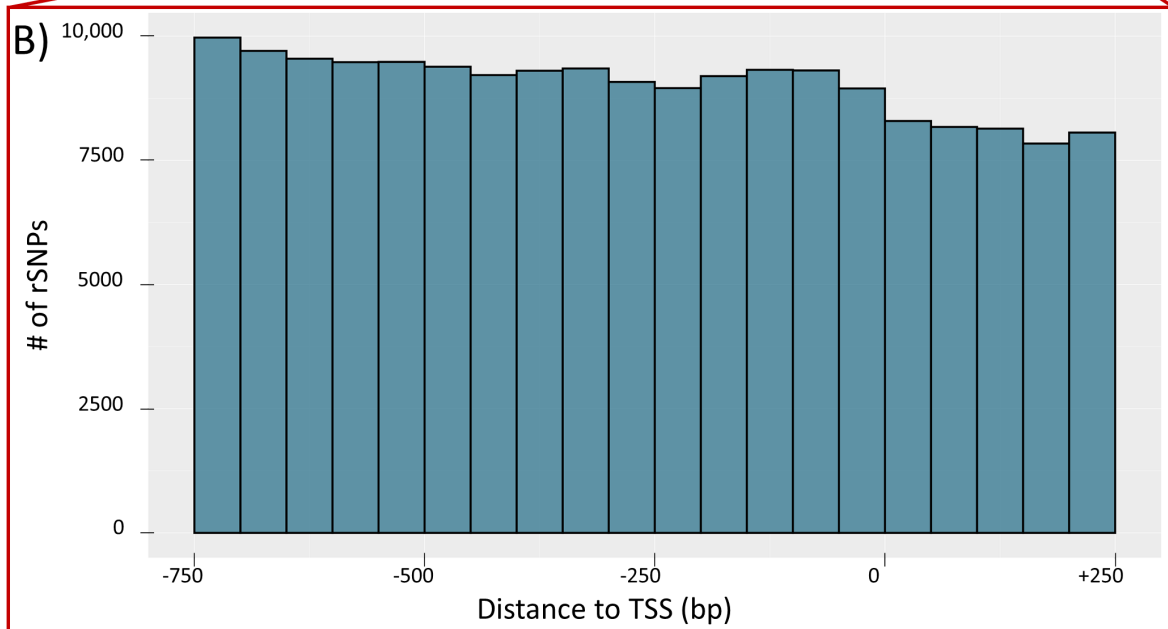

**Figure S4.2:** Distribution of rSNPs around the TSS of pig. A) shows the counts for the whole promoter region (-7.5 kb to +2.5 kb) in 500 bp intervals. The enlargement in B) shows the proximal promoter region (-750 bp to +250 bp) in 50 bp intervals.

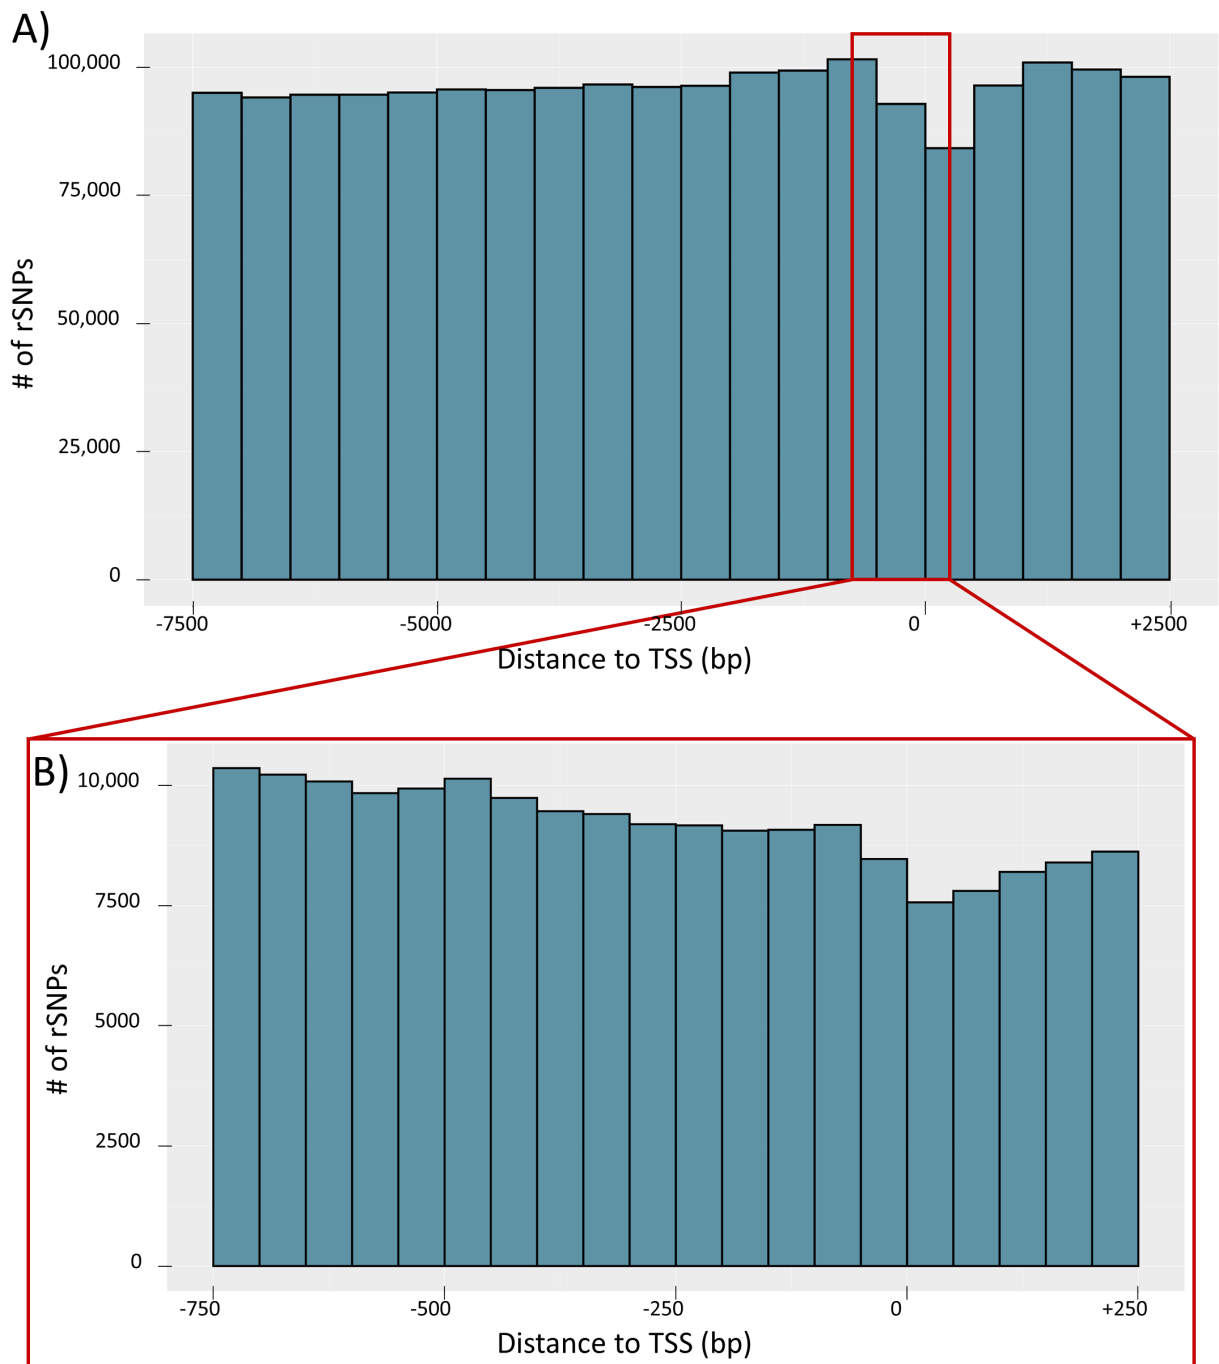

**Figure S4.3:** Distribution of rSNPs around the TSS of chicken. A) shows the counts for the whole promoter region (-7.5 kb to +2.5 kb) in 500 bp intervals. The enlargement in B) shows the proximal promoter region (-750 bp to +250 bp) in 50 bp intervals.

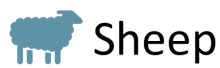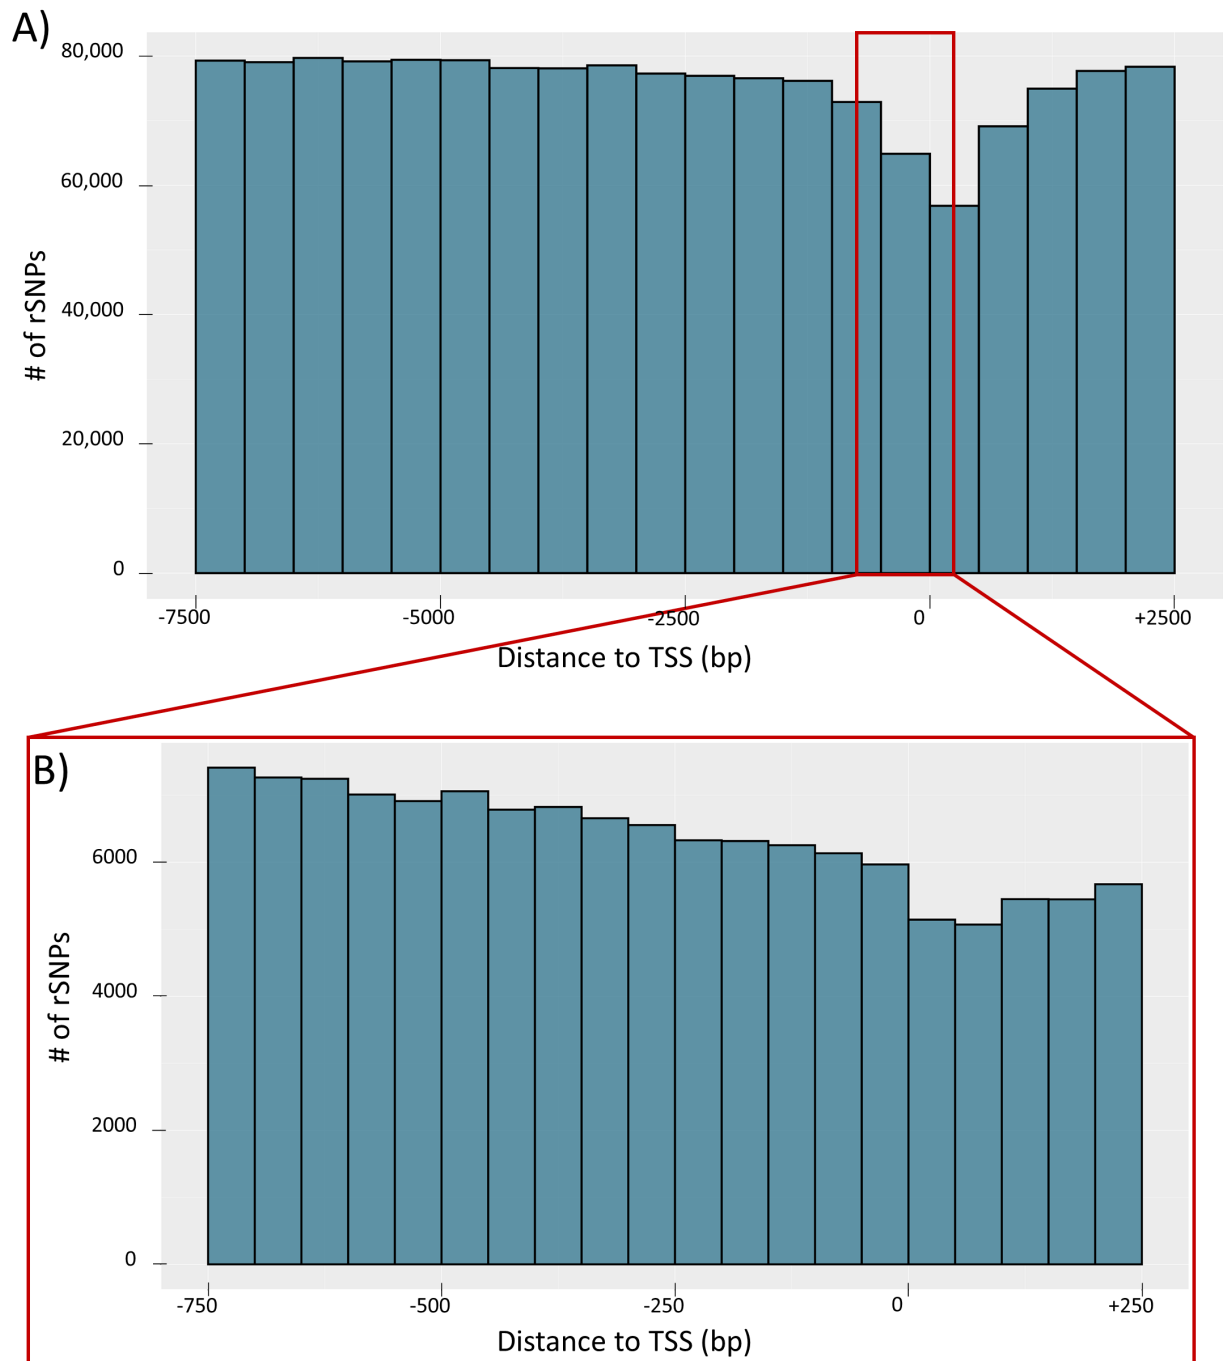

**Figure S4.4:** Distribution of rSNPs around the TSS of sheep. A) shows the counts for the whole promoter region (-7.5 kb to +2.5 kb) in 500 bp intervals. The enlargement in B) shows the proximal promoter region (-750 bp to +250 bp) in 50 bp intervals.

# Horse

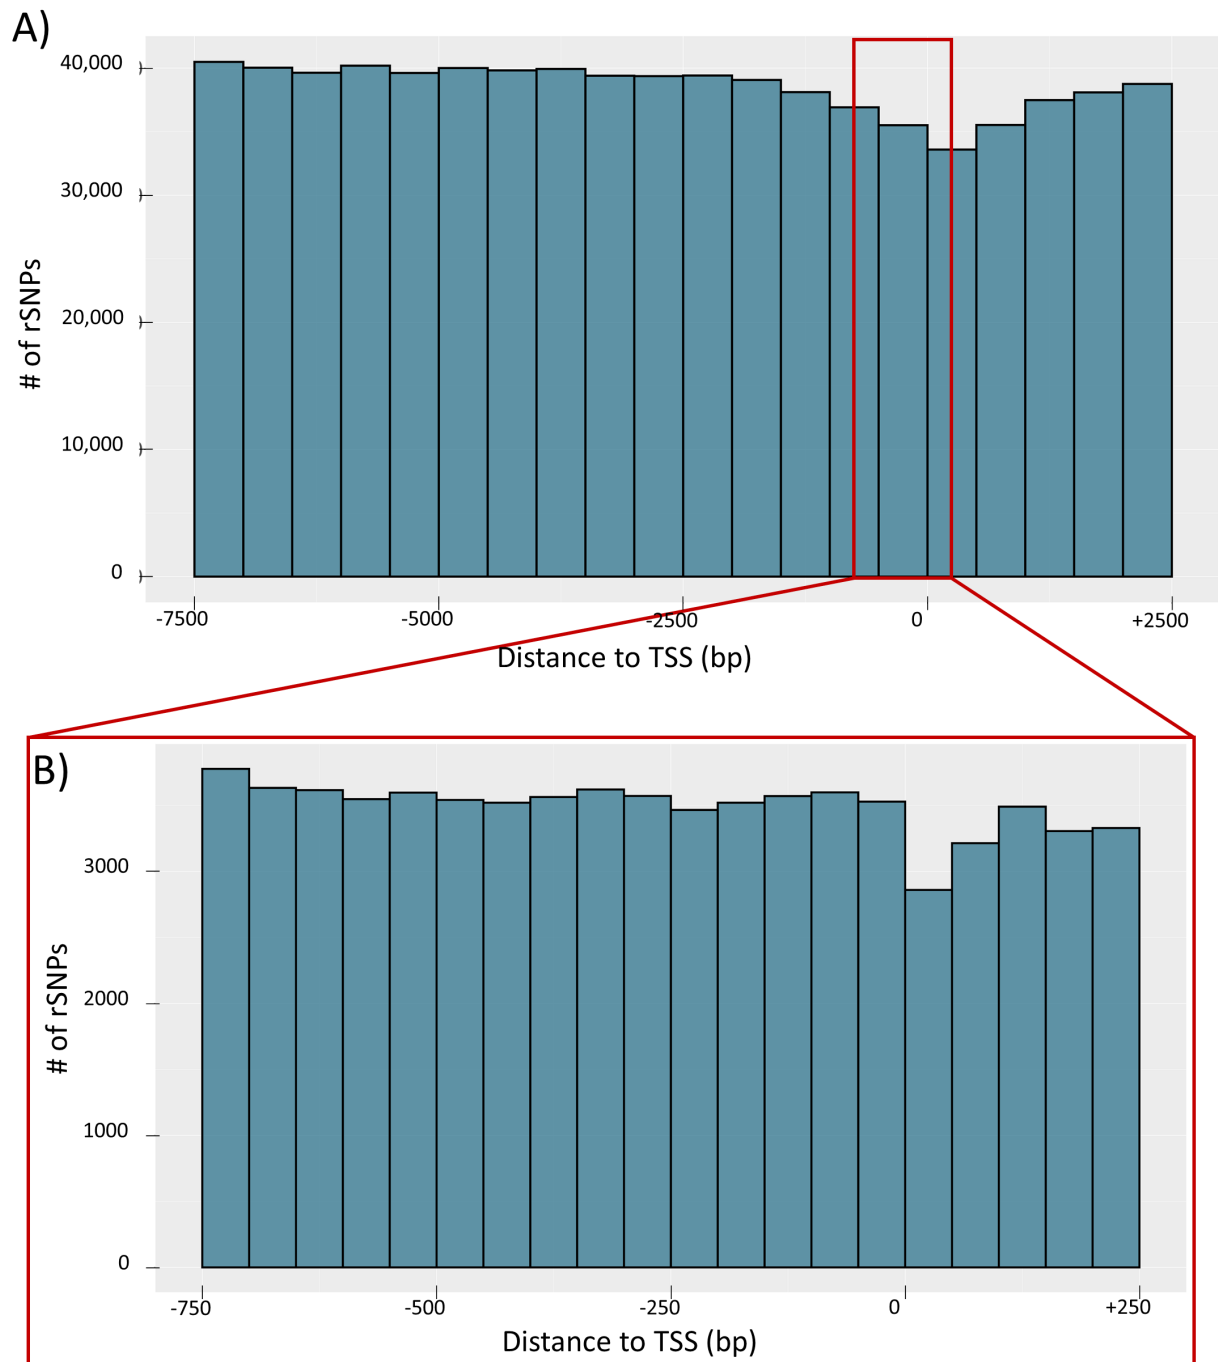

**Figure S4.5:** Distribution of rSNPs around the TSS of horse. A) shows the counts for the whole promoter region (-7.5 kb to +2.5 kb) in 500 bp intervals. The enlargement in B) shows the proximal promoter region (-750 bp to +250 bp) in 50 bp intervals.

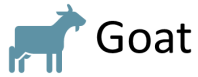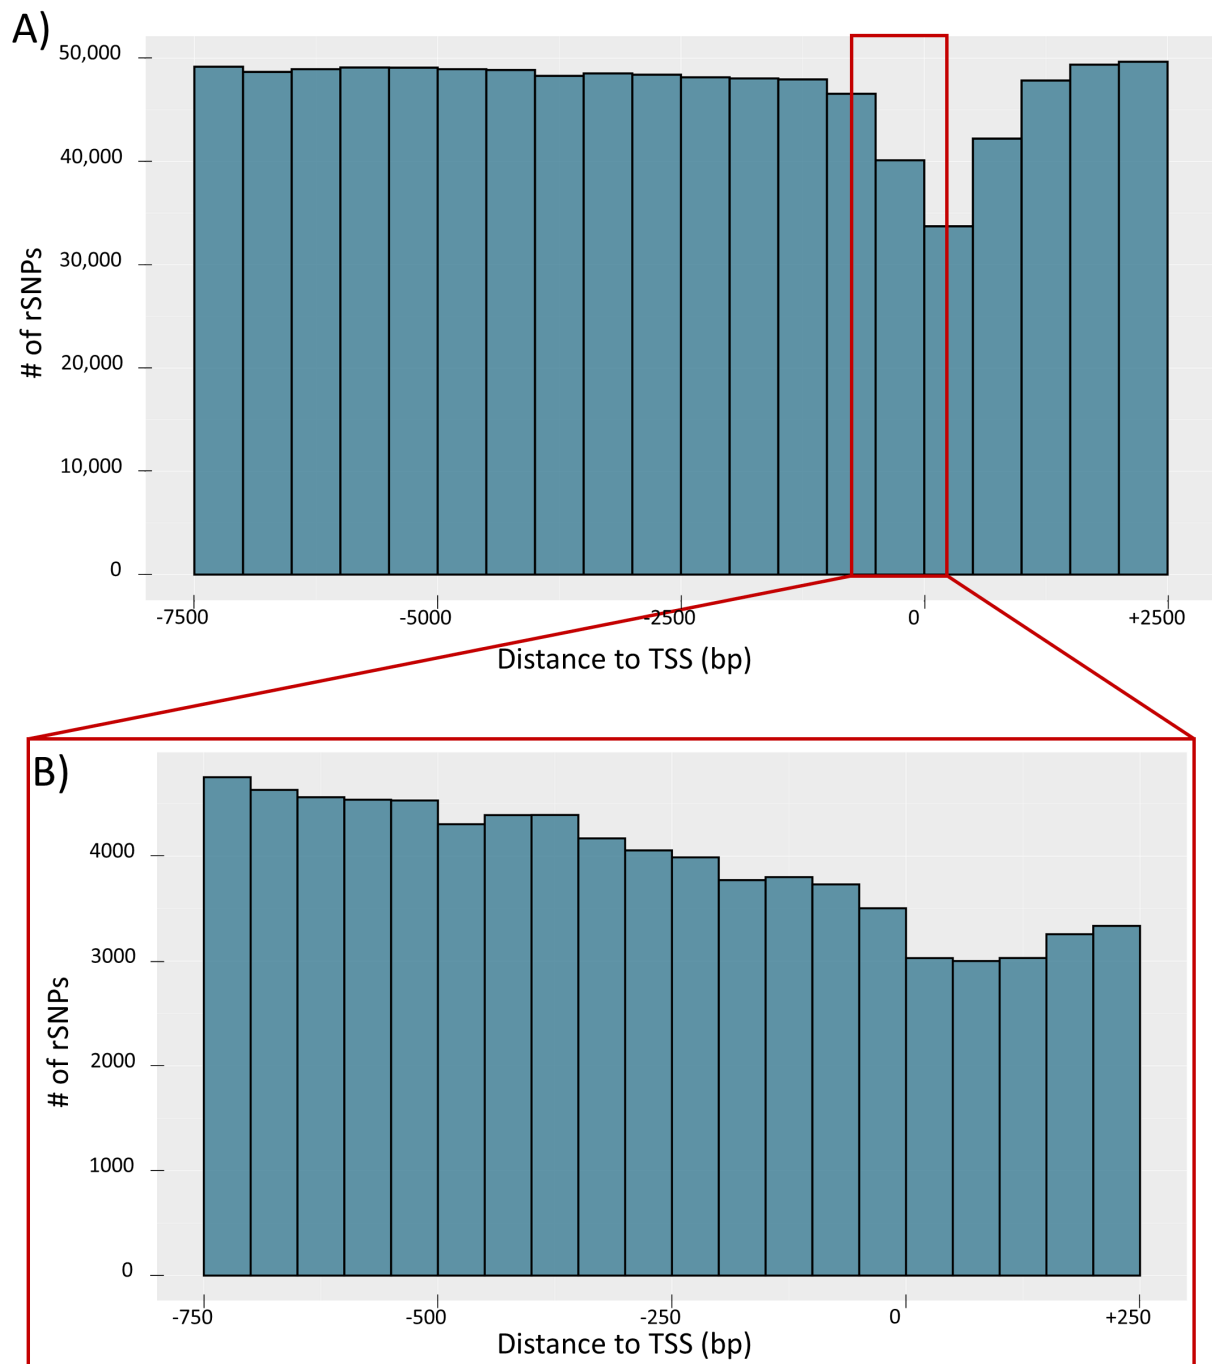

**Figure S4.6:** Distribution of rSNPs around the TSS of goat. A) shows the counts for the whole promoter region (-7.5 kb to +2.5 kb) in 500 bp intervals. The enlargement in B) shows the proximal promoter region (-750 bp to + 250 bp) in 50 bp intervals.

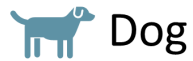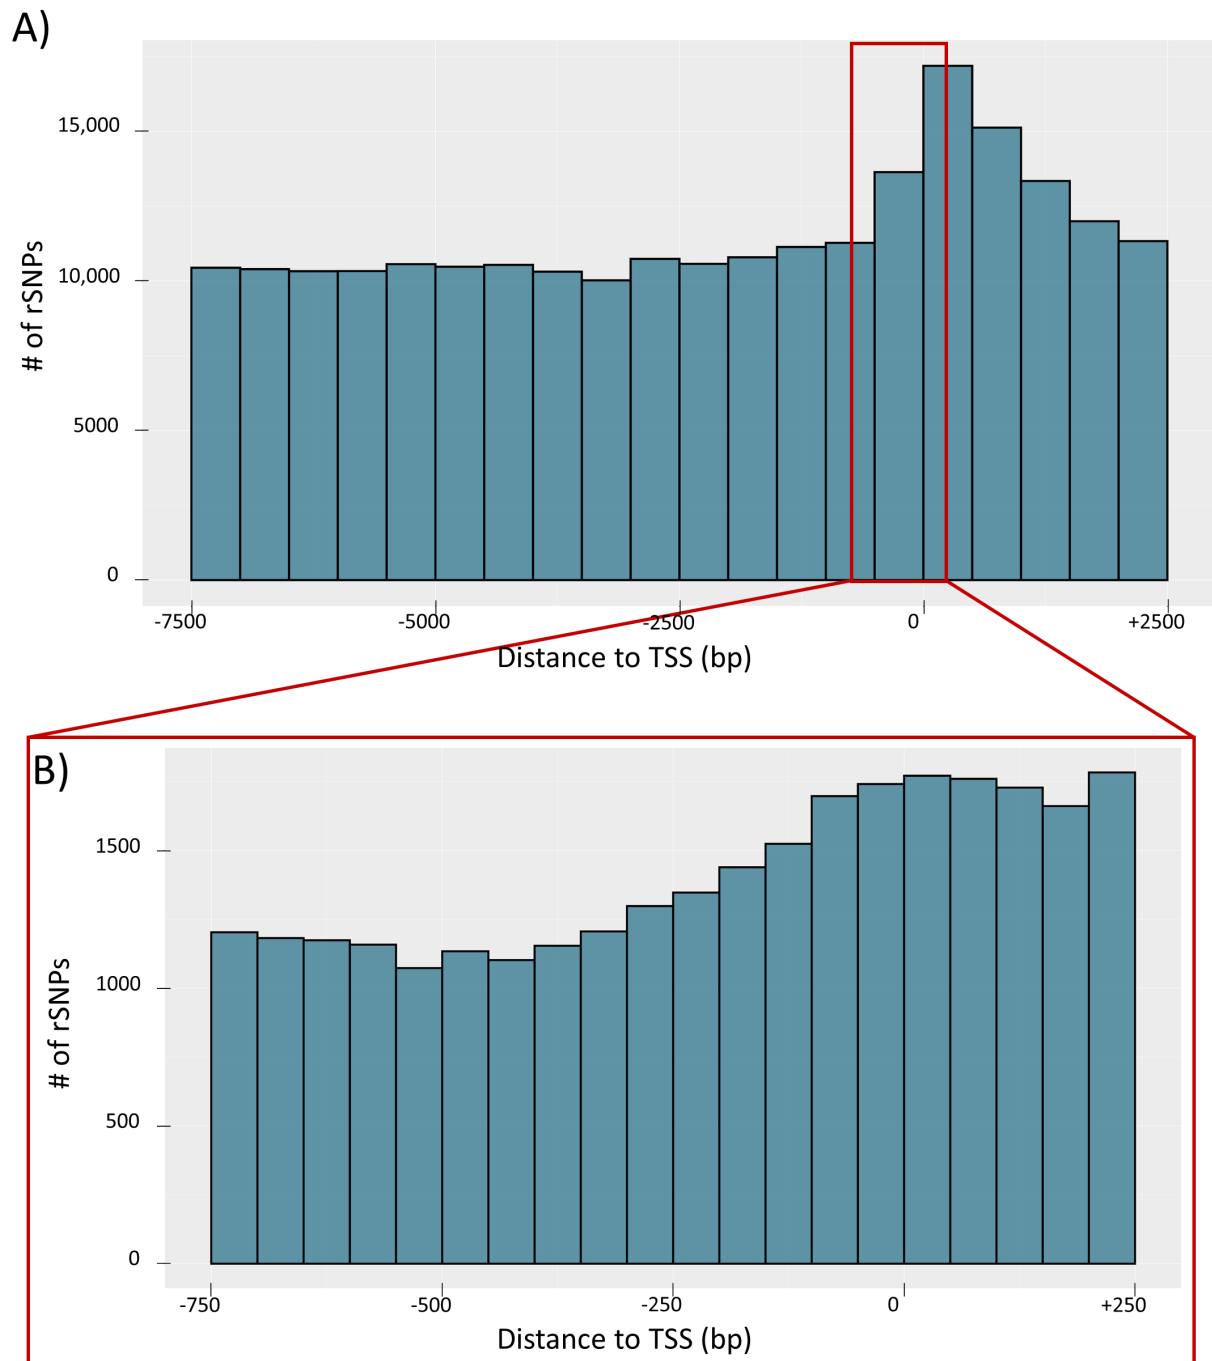

**Figure S4.7:** Distribution of rSNPs around the TSS of dog. A) shows the counts for the whole promoter region (-7.5 kb to +2.5 kb) in 500 bp intervals. The enlargement in B) shows the proximal promoter region (-750 bp to + 250 bp) in 50 bp intervals.
